# Supplementary material
Source: HighWire-hosted journal article supplement (https://www.annfammed.org/highwire/filestream/725/field_highwire_adjunct_files/0/Kimball-inno_Supp.pdf)
Supplement: Kimball-inno_Supp.pdf [file Kimball-inno_Supp.pdf]

## Supplemental materials for:

Kimball S, Maju M, Singh N, Sonis L. Embedding an immigration legal navigator in a primary care clinic. *Ann Fam Med*. 2019;17(2):177.

### Cover Letter

Immigration status is a crucial social determinant of health that exacerbates disparities in health outcomes among immigrants in the United States, yet few interventions exist to directly address the immigration legal needs of patients in a clinical setting. We describe a pilot program of having an Immigration Legal Navigator embedded in a primary care clinic with a high population of immigrant, refugee and asylum-seeking patients as a way to address and support these needs. This program is a new model to advocate for immigrant patients and their unique health and social needs that could be replicated in other clinical settings.

**Acknowledgements:** The authors would like to thank the New American Integration Program for their support and training of the navigator.

**Funding support:** Eastern Bank Charitable Foundation, \$10,000 grant

**Prior presentation:** Poster Presentation, “The Citizenship and Immigration Rights Navigator: A Model for Addressing Immigration Legal Needs in a Primary Care Setting.” North American Refugee Health Conference, Portland, Oregon, June 6, 2018

**Key words:** immigrant; refugee; social determinants of health; legal; medical legal partnership

### REFERENCES

1. Castañeda H, Holmes SM, Madrigal DS, Young M-ED, Beyeler N, Quesada J. Immigration as a social determinant of health. *Ann Rev Pub Health*. 2015;36(1):375-392. doi:10.1146/annurev-publhealth-032013-182419.
2. Katz MH, Chokshi DA. The “Public Charge” proposal and public health: implications for patients and clinicians. *JAMA*. 2018;320(20):2075-2076.

| <b>Supplemental Table 1. Characteristics of Referred Patients (N=271)</b> |                           |                   |
|---------------------------------------------------------------------------|---------------------------|-------------------|
| <b>Characteristics</b>                                                    | <b>Number of patients</b> | <b>% of total</b> |
| Sex                                                                       |                           |                   |
| Male                                                                      | 110                       | 40.60%            |
| Female                                                                    | 161                       | 59.40%            |
| Country of Origin                                                         |                           |                   |
| Uganda                                                                    | 88                        | 32.50%            |
| Haiti                                                                     | 35                        | 12.90%            |
| Somalia                                                                   | 12                        | 4.4%              |
| Cameroon                                                                  | 12                        | 4.4%              |
| Ethiopia                                                                  | 9                         | 3.30%             |
| El Salvador                                                               | 8                         | 3.00%             |
| Dominican Republic                                                        | 7                         | 2.60%             |
| Nigeria                                                                   | 6                         | 2.20%             |
| Interpreter Use                                                           |                           |                   |
| Yes                                                                       | 75                        | 27.70%            |
| No                                                                        | 196                       | 72.30%            |
| Top Languages Spoken                                                      |                           |                   |
| English                                                                   | 196                       | 72.30%            |
| Haitian Creole                                                            | 31                        | 11.40%            |
| Spanish                                                                   | 24                        | 8.86%             |

**Supplemental Table 2. Outcomes of Referrals for Patients Needing Community Referrals and Immigration Representation (N=155)**

|                                                         | <b>Asylum Applications</b> | <b>Family Reunification</b> | <b>Medical Deferred Action</b> | <b>Deportation Defense</b> | <b>Citizenship Support</b> | <b>General Immigration Support</b> | <b>Total</b> |
|---------------------------------------------------------|----------------------------|-----------------------------|--------------------------------|----------------------------|----------------------------|------------------------------------|--------------|
| Community Referral/Immigration Representation Secured   | 37 (38.9%)                 | 5 (41.7%)                   | 3 (75%)                        | 2 (100%)                   | 0 (0%)                     | 10 (35.7%)                         | 57 (36.8%)   |
| Community Referral/Immigration Representation Pending   | 58 (61.1%)                 | 7 (58.3%)                   | 1 (25%)                        | 0 (0%)                     | 0 (0%)                     | 18 (64.3%)                         | 84 (54.2%)   |
| Community Referral/No Immigration Representation Needed | 0 (0%)                     | 0 (0%)                      | 0 (0%)                         | 0 (0%)                     | 14 (100%)                  | 0 (0%)                             | 14 (9.0%)    |
|                                                         |                            |                             |                                |                            |                            |                                    | 155 (100%)   |

| <b>Supplemental Table 3. Outcomes of Referrals for Patients Needing Supportive Documentation (N=116)</b> |                      |                         |                                  |              |
|----------------------------------------------------------------------------------------------------------|----------------------|-------------------------|----------------------------------|--------------|
|                                                                                                          | <b>Civil Surgeon</b> | <b>Letter/Affidavit</b> | <b>Medical Disability Waiver</b> | <b>Total</b> |
| Supportive Documentation Completed                                                                       | 52 (94.5%)           | 14 (58.3%)              | 30 (81.1%)                       | 96 (82.8%)   |
| Supportive Documentation in Process                                                                      | 3 (5.5%)             | 10 (41.7%)              | 7 (18.9%)                        | 20 (17.2%)   |
|                                                                                                          |                      |                         |                                  | 116 (100%)   |
